# Supplementary material
Source: PubMed Central journal article supplement (PMC1463186)
Supplement: bjpg55-119TableS1.pdf [file bjpg55-119TableS1.pdf]

Supplementary Table 1. Sensitivity analysis I: proportion reviewed.

| Scenario               | Treatment arm | Total cost (£) | Number reviewed | Cost per consultation (£) | Saving per consultation (£) |
|------------------------|---------------|----------------|-----------------|---------------------------|-----------------------------|
| Lower 95% CI telephone | Telephone     | 660.96         | 90              | 7.34                      | 3.93                        |
| Lower 95% CI surgery   | Surgery       | 631.53         | 56              | 11.27                     |                             |
| Lower 95% CI telephone | Telephone     | 660.96         | 90              | 7.34                      | 3.66                        |
| Upper 95% CI surgery   | Surgery       | 879.69         | 80              | 11.00                     |                             |
| Upper 95% CI telephone | Telephone     | 783.6          | 111             | 7.06                      | 4.21                        |
| Lower 95% CI surgery   | Surgery       | 631.53         | 56              | 11.27                     |                             |
| Upper 95% CI telephone | Telephone     | 783.6          | 111             | 7.06                      | 3.94                        |
| Upper 95% CI surgery   | Surgery       | 879.69         | 80              | 11.00                     |                             |

Scenarios based on the 95% confidence intervals for the proportion reviewed in each group as follows: telephone, proportion reviewed  $101/137 = 74\%$  (95% CI 66% to 81%), that is 90/137 to 111/137; surgery, proportion reviewed  $68/141 = 48\%$  (95% CI 40% to 57%), that is 56/141 to 80/141. Total costs calculated as follows: telephone, mean cost of nurse time and telephone costs of a consultation (£5.84) multiplied by the presumed number of reviews achieved + the total cost of abortive calls (£135.36); surgery, mean cost of nurse time for a consultation (£10.34) multiplied by the presumed number of reviews achieved + the total cost of missed consultations (£52.49).
