# Supplementary material
Source: PubMed Central journal article supplement (PMC1463186)
Supplement: bjpg55-119TableS2.pdf [file bjpg55-119TableS2.pdf]

Supplementary Table 2. Sensitivity analysis II: duration of the consultation.

| Scenario                                       | Treatment arm | Number of calls and duration (minutes) | Total cost (£) | Cost per consultation (£) | Saving per consultation (£) | Saving per consultation assuming zero cost for non-attendance (£) |
|------------------------------------------------|---------------|----------------------------------------|----------------|---------------------------|-----------------------------|-------------------------------------------------------------------|
| Lower 95% CI telephone<br>Lower 95% CI surgery | Telephone     | 101 at 10.39                           | 681.04         | 6.74                      | 3.99                        | 3.21                                                              |
|                                                | Surgery       | 68 at 20.74                            | 729.44         | 10.73                     |                             |                                                                   |
| Lower 95% CI telephone<br>Upper 95% CI surgery | Telephone     | 101 at 10.39                           | 681.04         | 6.74                      | 5.07                        | 4.30                                                              |
|                                                | Surgery       | 68 at 23.00                            | 803.21         | 11.81                     |                             |                                                                   |
| Upper 95% CI telephone<br>Lower 95% CI surgery | Telephone     | 101 at 11.99                           | 765.07         | 7.57                      | 3.16                        | 2.38                                                              |
|                                                | Surgery       | 68 at 20.74                            | 729.44         | 10.73                     |                             |                                                                   |
| Upper 95% CI telephone<br>Upper 95% CI surgery | Telephone     | 101 at 11.99                           | 765.07         | 7.57                      | 4.24                        | 3.47                                                              |
|                                                | Surgery       | 68 at 23.00                            | 803.21         | 11.81                     |                             |                                                                   |

Scenarios based on the 95% confidence intervals for the duration of consultation in each group as follows: telephone, duration 11.19 minutes (SD 4.79) (95% CI 10.39 to 11.99); surgery, duration 21.87 minutes (SD 6.85) (95% CI 20.74 to 23.00). Total costs calculated as follows: telephone, assuming 101 telephone consultations at £0.48/minute nurse costs and £0.043/minute telephone costs (this is an average cost/min – most calls were local, a few national and some mobiles) + the total cost of abortive calls (£135.36); surgery, assuming 68 surgery consultations at £0.48/minute nurse costs + the total cost of missed consultations (£52.49). Surgery costs exclude the cost of missed consultations (total cost = £52.49). SD = standard deviation.
